# Supplementary material for: Assessing Computational Methods for Transcription Factor Target Gene Identification Based on ChIP-seq Data
Source: PLOS journal article supplement (doi:10.1371/journal.pcbi.1003342), 2013-11-21

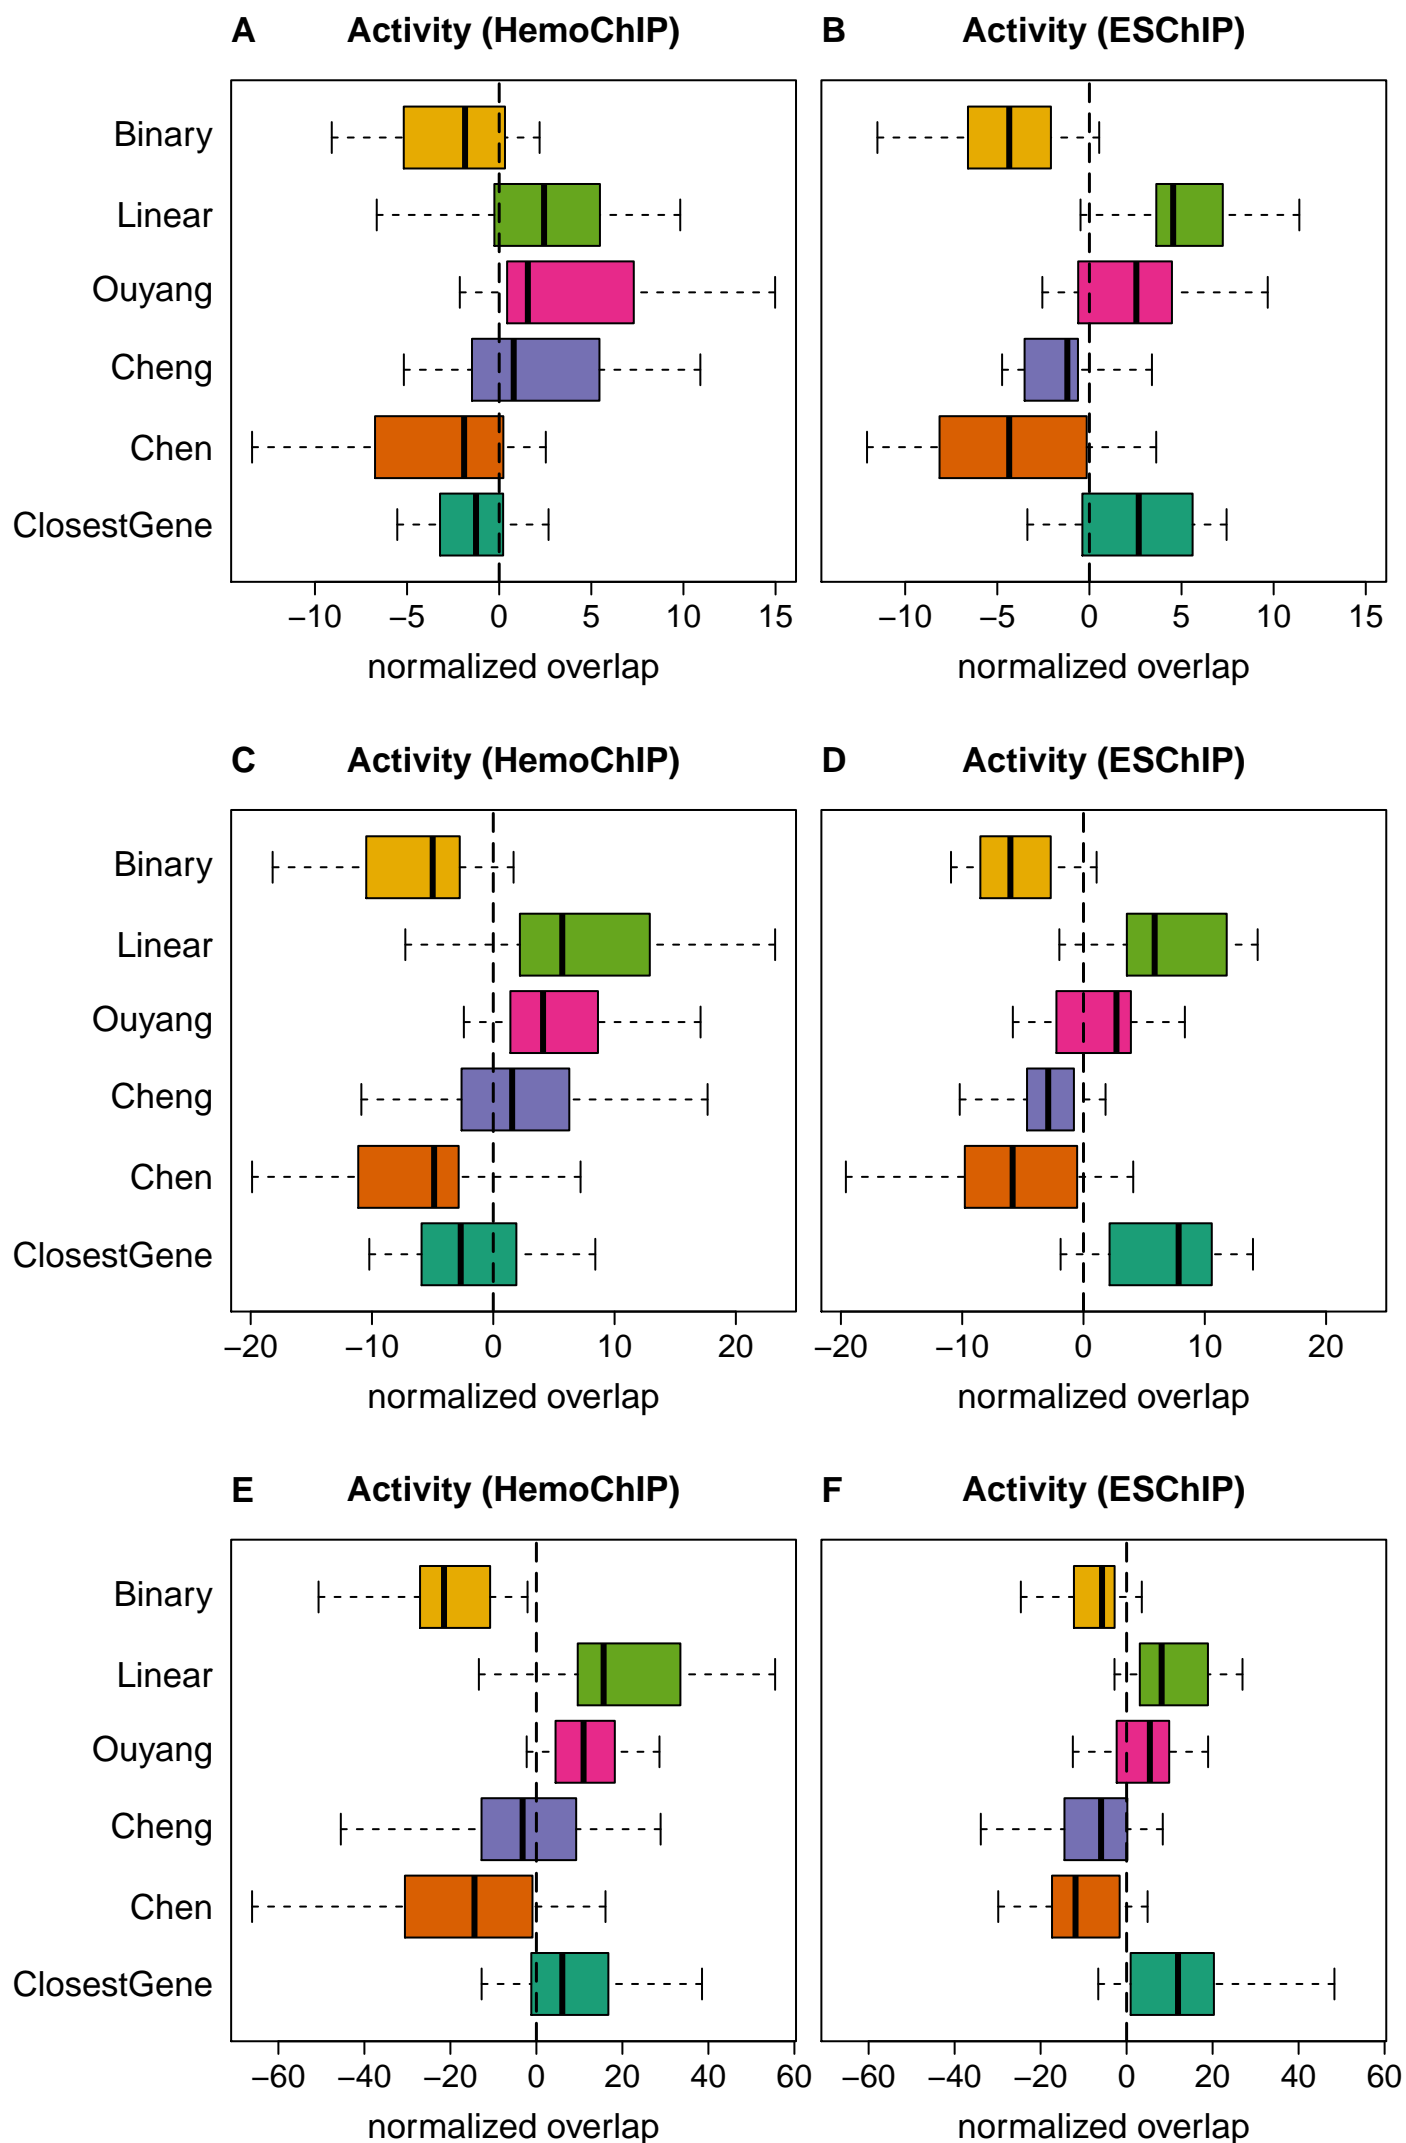

Supplement: S6 (10.1371/journal.pcbi.1003342.s006) [file journal.pcbi.1003342.s006]
