# Supplementary material for: Assessing Computational Methods for Transcription Factor Target Gene Identification Based on ChIP-seq Data
Source: PLOS journal article supplement (doi:10.1371/journal.pcbi.1003342), 2013-11-21

**A Perturbation (HemoChIP)**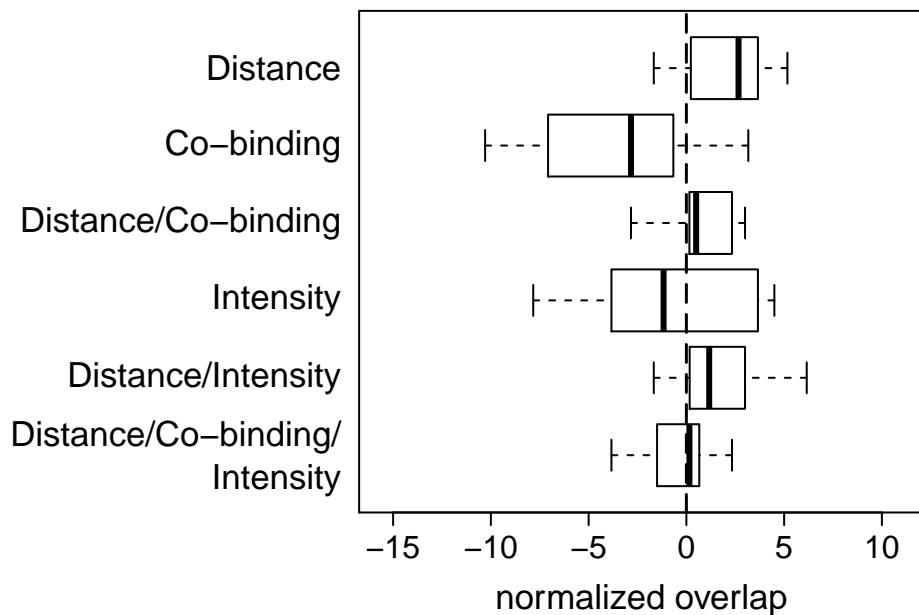**B Perturbation (ESChIP)**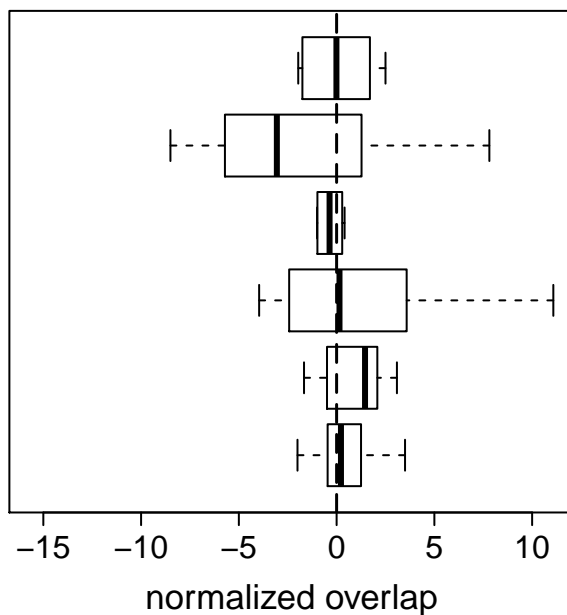**C Activity (HemoChIP)**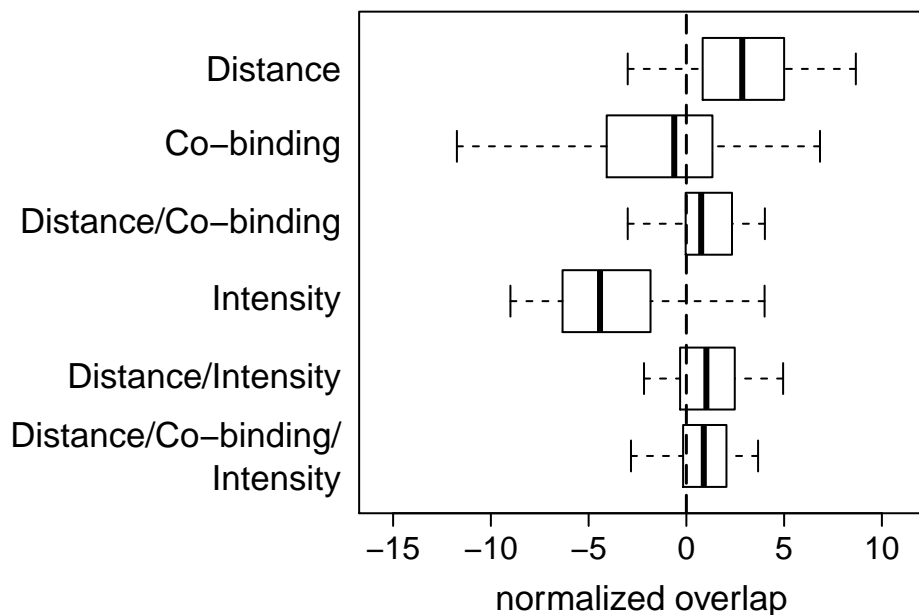**D Activity (ESChIP)**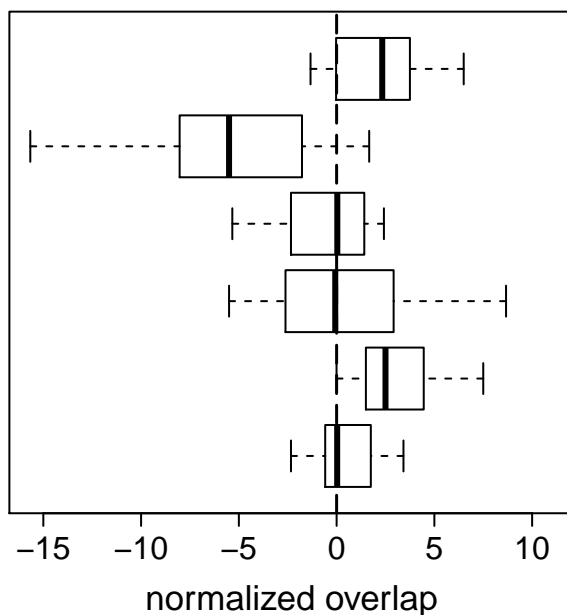

Supplement: S12 (10.1371/journal.pcbi.1003342.s012) [file journal.pcbi.1003342.s012]
